# Supplementary material for: Inhibiting tryptophan metabolism enhances interferon therapy in kidney cancer
Source: PubMed Central journal article supplement (PMC5341819; doi:10.18632/oncotarget.11658), 2016-08-27
Supplement: oncotarget-07-66540-s001.pdf [file oncotarget-07-66540-s001.pdf]

## Inhibiting tryptophan metabolism enhances interferon therapy in kidney cancer

### Supplementary Material

Table S1. PCR primers used for quantitative PCR.

| Accession Number | Gene                      | Forward and Reverse Primers (5'-3')                    | T <sub>m</sub> <sup>1</sup> (°C) | E <sup>2</sup> (%) |
|------------------|---------------------------|--------------------------------------------------------|----------------------------------|--------------------|
| NM_005651        | <i>hTDO2</i>              | GCACTTCAGGGAGCATTGAT<br>TCACTCACAGTTGATCGCAG           | 64                               | 103                |
|                  | <i>hIDO1</i> <sup>3</sup> | GGTCATGGAGATGTCCGTAA<br>ACCAATAGAGAGACCAGGAAGAA        | 62                               | 97                 |
| NM_019911        | <i>mTdo2</i>              | ATGGCTGGAAAGAACACCTG<br>CATCAAACAAGCAGAGCAGC           | 63                               | 79                 |
|                  | <i>mIdo1</i> <sup>4</sup> | GTACATCACCATGGCGTATG<br>CGAGGAAGAAGCCCTTGTC            | 60                               | 88                 |
| NM_001289726     | <i>mGapdh</i>             | TGATGGGTGTGAACCACGAG<br>AAGTCGCAGGAGACAACCTG           | 63                               | 53                 |
|                  | <i>Rn18S</i> <sup>5</sup> | ACGGCTACCACATCCAAGGA<br>CCAATTACAGGGCCTCGAAA           | 60                               | 90                 |
|                  | <i>PPIA</i> <sup>6</sup>  | ACCGCCGAGGAAAACCGTGTA<br>TGCTGTCTTTGGGACCTTGTCTGC      | 64                               | 95                 |
|                  | <i>RPS13</i> <sup>6</sup> | TCGGCTTTACCCTATCGACGCAG<br>ACGTACTIONTGTGCAACACCATGTGA | 64                               | 101                |

<sup>1</sup>Annealing and extension temperature.

<sup>2</sup>Primer pair efficiency (E).

<sup>3</sup>Reisenberg *et al.* [1]

<sup>4</sup>Uyttenhove *et al.* [2]

<sup>5</sup>Rowson-Hodel *et al.* [3]

<sup>6</sup>Dupasquier *et al.* [4]

#### qPCR Methods

Total RNA was extracted from tissue or cells using Trizol (Invitrogen) and its integrity confirmed by gel electrophoresis. Primers for qPCR (Table S1) were designed using Primer Blast (<http://www.ncbi.nlm.nih.gov/tools/primer-blast/>) to be in different exons and not amplify non-specific cDNA or gDNA. This was confirmed by performing

PCR on reverse transcription negative control reactions performed in the absence of reverse transcriptase. The tryptophan-2,3-dioxygenase (*TDO2*) and mouse glyceraldehyde-3-phosphate dehydrogenase (*Gapdh*) PCR products were confirmed by sequencing. Reference genes for mouse samples were 18S ribosomal RNA (*Rn18S*) and *Gapdh* (Table S1). Reference genes for human samples were cyclophilin A (*PPIA*) and ribosomal protein S13 (*RPS13*) as described by Dupasquier *et al.*, [4; Table S1]. Total RNA (0.5 µg) was reverse transcribed in 20 µl using MultiScribe reverse transcriptase (Thermo Fisher Scientific; 50U). The resulting cDNA was diluted (1:4 or 1:50) before 1 µl was analyzed using SYBR green PCR master mix (Applied Biosystems, Foster City, CA) with 0.25 µM primers on a ViiA™ 7 Real-Time PCR System (Applied Biosystems). Cycling conditions were 50°C for 2 min, 95°C for 10 min then 40 cycles of 95°C for 15 s and 1 min at 60, 62, 63 or 64°C (Table S1). Each qPCR run included a no-template control containing all reagents except cDNA. Standard curves were prepared using 6 to 7 five-fold serial dilutions of either mouse or human liver cDNA. One standard curve was used for all qPCR plates within an experiment. All standard curves had a linear regression coefficient of determination of at least 99.4%. The mRNA or rRNA levels in each mouse sample were calculated from Ct values using a standard curve. The relative mRNA levels in each human sample were calculated from Ct values using the delta-delta Ct method relative to an average of the two housekeeping Ct values.

Table S2. Immunohistochemistry staining score of RCC and adjacent normal kidney tissue.

| Antibody                 | IDO1 <sup>3</sup> | IDO1             | IDO1               | CD68 <sup>4</sup>  |
|--------------------------|-------------------|------------------|--------------------|--------------------|
| Tissue                   | Endothelial cells | Neoplastic cells | Interstitial cells | Interstitial cells |
| Kidney Neg <sup>1</sup>  | 0                 | 0                | 0                  | n/a                |
| Kidney-1                 | 0                 | 0                | 0                  | 0.5                |
| Kidney-2                 | 0                 | 0                | 0                  | 0.5                |
| Kidney-3                 | 0                 | 0                | 0                  | 1                  |
| Grade 2 <sup>2</sup> Neg | 0                 | 0                | 0                  | 0                  |
| Grade 2-1                | 1                 | 0                | 1                  | 2.5                |
| Grade 2-2                | 3                 | 1                | 1                  | 3                  |
| Grade 2-3                | 2                 | 1                | 1                  | 2                  |
| Grade 3 Neg              | 0                 | 0                | 0                  | 0                  |
| Grade 3-1                | 2                 | 0                | 1                  | 4                  |
| Grade 3-2                | 2                 | 0                | 1                  | 5                  |
| Grade 3-3                | 3                 | 0                | 1                  | 2.5                |

<sup>1</sup>Neg=secondary antibody only

<sup>2</sup>Grade of renal cell carcinoma (RCC)

<sup>3</sup>Score for IDO1: 0=no staining, 1=1-10%, 2=10-20%, 3=20-40% staining, respectively

<sup>4</sup>Score for CD68: 0=no staining, 1=1-10%, 2=10-20%, 3=20-30%, 4=30-40%, 5=40-50% positive interstitial cells

## REFERENCES

1. Riesenbergr R, Weiler C, Spring O, Eder M, Buchner A, Popp T et al. Expression of indoleamine 2,3-dioxygenase in tumor endothelial cells correlates with long-term survival of patients with renal cell carcinoma. *Clin Cancer Res.* 2007; 13(23):6993-7002.
2. Uyttenhove C, Pilotte L, Theate I, Stroobant V, Colau D, Parmentier N et al. Evidence for a tumoral immune resistance mechanism based on tryptophan degradation by indoleamine 2,3-dioxygenase. *Nat Med.* 2003; 9(10):1269-74.
3. Rowson-Hodel AR, Manjarin R, Trott JF, Cardiff RD, Borowsky AD, Hovey RC. Neoplastic transformation of porcine mammary epithelial cells in vitro and tumor formation in vivo. *BMC Cancer.* 2015; 15:562.
4. Dupasquier S, Delmarcelle AS, Marbaix E, Cosyns JP, Courtoy PJ, Pierreux CE. Validation of housekeeping gene and impact on normalized gene expression in clear cell renal cell carcinoma: critical reassessment of YBX3/ZONAB/CSDA expression. *BMC Mol Biol.* 2014; 15:9.
